# Supplementary material
Source: PubMed Central journal article supplement (PMC3829477)

Supplementary Figure 1 - *Ubiquitinated Ag-BCR Complexes Remain Restricted to Lipid Raft*

*Membrane Domains at Physiological Range of Temperatures*

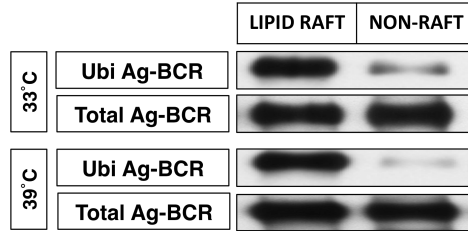

Supplement: NIHMS514394-supplement-supplement_1.pdf [file NIHMS514394-supplement-supplement_1.pdf]
